# Supplementary material for: Characterization of Extracellular Vesicles from Bronchoalveolar Lavage Fluid and Plasma of Patients with Lung Lesions Using Fluorescence Nanoparticle Tracking Analysis
Source: MDPI journal article supplement (doi:10.3390/cells10123473), 2021-12-09

**Supplementary data:**

**Supplementary Table S1. Fluorescent label, antibodies, isotype controls, and secondary antibody used for NTA, flow cytometry, and Western blot analysis**

| Antibody/dye                             | Source, Catalog number:                         | Antigen                     | Dilution  | Application    |
|------------------------------------------|-------------------------------------------------|-----------------------------|-----------|----------------|
| CellMask™ Deep Red plasma membrane stain | Invitrogen™ Thermo Fisher Scientific, C10046    | Membrane Stain              | 1:1250000 | NTA            |
| PE                                       | Invitrogen™ Thermo Fisher Scientific, MA1-19650 | CD63                        | 1:5000    | NTA            |
| PE                                       | Biolegend, 349506                               | CD81                        | 1:40000   | NTA            |
| PE                                       | Biolegend, 312106                               | CD9                         | 1:6000    | NTA            |
| FITC                                     | Beckman Coulter, IM1755U                        | CD9                         | 1:20      | Flow cytometry |
| PE                                       | BD Pharmingen™, 556020                          | CD63                        | 1:20      | Flow cytometry |
| APC                                      | Beckman Coulter, A87789                         | CD81                        | 1:20      | Flow cytometry |
| Mouse IgG1 κ Isotype Control -PE         | eBioscience™, 12-4714-82                        | Isotype Control PE          | 1:10      | Flow cytometry |
| Mouse IgG2b κ Isotype Control -APC       | eBioscience™, 17-4732-81                        | Isotype Control APC         | 1:10      | Flow cytometry |
| Mouse IgG2b κ Isotype Control-FITC       | eBioscience™, 11-4732-81                        | Isotype Control FITC        | 1:10      | Flow cytometry |
| Anti-ALIX                                | abcam, ab117600                                 | ALIX                        | 1:1000    | WB             |
| Anti-Calnexin                            | abcam, ab13504                                  | Calnexin                    | 1:2000    | WB             |
| Anti-CD9                                 | Invitrogen™ Thermo Fisher Scientific, 10626D    | CD9                         | 1:500     | WB             |
| Anti-CD81                                | Invitrogen™ Thermo Fisher Scientific, 10630D    | CD81                        | 1:1000    | WB             |
| Anti-NY-ESO-1                            | Santa Cruz Biotechnology, Sc-53869              | NY-ESO-1                    | 1:200     | WB             |
| Anti-Synthenin                           | abcam, ab19903                                  | Synthenin                   | 1:1000    | WB             |
| Anti-Tsg-101                             | abcam, ab30871                                  | TSG-101                     | 1:1000    | WB             |
| Biotin Anti-Ali-poprotein B              | Abcam, ab20898                                  | Apo-B                       | 1:1000    | WB             |
| HRP                                      | Thermo Fisher Scientific, A16078                | mouse antibodies            | 1:10000   | WB             |
| HRP                                      | Thermo Fisher Scientific, A16110                | rabbit antibodies           | 1:10000   | WB             |
| HRP                                      | Santa Cruz Biotechnology, Sc-2020               | donkey anti-goat antibodies | 1:10000   | WB             |

**Supplementary Table S2. Concentration of particles for 1 mL of plasma/BALF in scatter, membrane, and tetraspanin labeling**

| Pt | Plasma EVs                                             |                                                  |                                                 | cBALF EVs                                               |                                                      |                                                      |                                                      |                                                     | oBALF EVs                                               |                                                      |                                                      |                                                      |                                                     |
|----|--------------------------------------------------------|--------------------------------------------------|-------------------------------------------------|---------------------------------------------------------|------------------------------------------------------|------------------------------------------------------|------------------------------------------------------|-----------------------------------------------------|---------------------------------------------------------|------------------------------------------------------|------------------------------------------------------|------------------------------------------------------|-----------------------------------------------------|
|    | Scatter<br>[particles<br>x10 <sup>-7</sup> /mL plasma] | CMDR<br>[particles x10 <sup>-7</sup> /mL plasma] | CD9<br>[particles x10 <sup>-7</sup> /mL plasma] | Scatter<br>[particles<br>x10 <sup>-7</sup> /mL<br>BALF] | CMDR<br>[particles<br>x10 <sup>-7</sup> /mL<br>BALF] | CD63<br>[particles<br>x10 <sup>-7</sup> /mL<br>BALF] | CD81<br>[particles<br>x10 <sup>-7</sup> /mL<br>BALF] | CD9<br>[particles<br>x10 <sup>-7</sup> /mL<br>BALF] | Scatter<br>[particles<br>x10 <sup>-7</sup> /mL<br>BALF] | CMDR<br>[particles<br>x10 <sup>-7</sup> /mL<br>BALF] | CD63<br>[particles<br>x10 <sup>-7</sup> /mL<br>BALF] | CD81<br>[particles<br>x10 <sup>-7</sup> /mL<br>BALF] | CD9<br>[particles<br>x10 <sup>-7</sup> /mL<br>BALF] |
| 1  | 6600.0                                                 | 2333.3                                           | 2533.3                                          | 136.0                                                   | 86.0                                                 | 55.7                                                 | 41.6                                                 | 123.0                                               | 101.3                                                   | 27.2                                                 | 80.8                                                 | 28.7                                                 | 147.7                                               |
| 2  | 4733.3                                                 | 1966.7                                           |                                                 | 68.0                                                    | 17.1                                                 | 10.3                                                 |                                                      | 39.7                                                | 29.0                                                    | 7.3                                                  | 6.9                                                  |                                                      | 10.6                                                |
| 3  | 3466.7                                                 | 2600.0                                           |                                                 | 1.0                                                     | 0.4                                                  | 0.4                                                  | 0.2                                                  | 0.7                                                 | 40.0                                                    | 14.7                                                 | 64.1                                                 | 5.5                                                  | 48.0                                                |
| 4  | 41866.7                                                | 6080.0                                           |                                                 | 4.5                                                     | 2.5                                                  | 0.4                                                  |                                                      | 0.2                                                 | 143.6                                                   | 92.8                                                 | 54.2                                                 | 17.6                                                 | 69.1                                                |
| 5  | 6666.7                                                 | 1873.3                                           |                                                 | 153.3                                                   | 33.7                                                 | 13.7                                                 |                                                      | 21.1                                                | 97.5                                                    | 68.1                                                 | 36.0                                                 | 13.2                                                 | 20.8                                                |
| 6  | 24000.0                                                | 6933.3                                           |                                                 | 91.8                                                    | 56.5                                                 | 25.1                                                 | 8.6                                                  | 40.0                                                | 55.6                                                    | 37.1                                                 | 80.4                                                 | 5.2                                                  | 22.8                                                |
| 7  | 22533.3                                                | 7866.7                                           |                                                 | 5.0                                                     | 2.8                                                  | 0.5                                                  |                                                      | 1.4                                                 | 42.6                                                    | 19.3                                                 | 10.7                                                 |                                                      | 26.2                                                |
| 8  | 1033.3                                                 | 56.0                                             |                                                 | 34.7                                                    | 15.1                                                 | 7.7                                                  | 3.3                                                  | 12.6                                                | 56.7                                                    | 29.3                                                 | 8.5                                                  |                                                      | 74.7                                                |
| 9  | 4533.3                                                 | 1493.3                                           |                                                 | 106.7                                                   | 62.1                                                 | 45.7                                                 |                                                      | 127.8                                               | 12.5                                                    | 5.0                                                  | 2.0                                                  |                                                      | 7.3                                                 |
| 10 | 9066.7                                                 | 4466.7                                           | 3600.0                                          | 52.8                                                    | 62.4                                                 | 66.4                                                 |                                                      | 70.4                                                | 225.3                                                   | 269.3                                                | 69.3                                                 |                                                      | 110.7                                               |
| 11 | 8000.0                                                 | 3166.7                                           |                                                 | 96.7                                                    | 59.3                                                 | 54.0                                                 | 44.0                                                 | 62.7                                                | 125.2                                                   | 61.3                                                 | 5.3                                                  | 4.4                                                  | 12.3                                                |
| 12 | 28666.7                                                | 2000.0                                           |                                                 | 118.8                                                   | 58.6                                                 | 212.7                                                |                                                      | 63.7                                                | 47.6                                                    | 22.3                                                 | 15.1                                                 |                                                      | 13.5                                                |
| 13 | 122000.0                                               | 24666.7                                          |                                                 |                                                         |                                                      |                                                      |                                                      |                                                     | 4.1                                                     | 0.8                                                  | 0.9                                                  |                                                      | 1.9                                                 |
| 14 | 26796.0                                                | 9034.7                                           |                                                 | 23.6                                                    | 11.9                                                 | 16.0                                                 | 10.0                                                 | 37.0                                                | 24.7                                                    | 18.6                                                 | 16.9                                                 | 9.5                                                  | 27.1                                                |
| 15 | 6066.7                                                 | 3866.7                                           |                                                 | 19.2                                                    | 9.2                                                  | 16.8                                                 | 1.3                                                  | 36.7                                                | 145.7                                                   | 81.4                                                 | 82.9                                                 | 6.6                                                  | 138.6                                               |
| 16 | 26400.0                                                | 7333.3                                           |                                                 | 114.2                                                   | 75.8                                                 | 153.8                                                | 66.7                                                 | 143.6                                               | 35.4                                                    | 18.2                                                 | 19.1                                                 |                                                      | 21.4                                                |
| 17 | 32266.7                                                | 9466.7                                           |                                                 | 35.3                                                    | 14.4                                                 | 19.1                                                 |                                                      | 14.3                                                | 50.0                                                    | 28.5                                                 | 44.0                                                 |                                                      | 37.0                                                |
| 18 | 8133.3                                                 | 2160.0                                           |                                                 | 16.7                                                    | 7.1                                                  | 4.1                                                  |                                                      | 8.5                                                 | 36.0                                                    | 17.5                                                 | 11.9                                                 |                                                      | 16.8                                                |
| 19 | 28533.3                                                | 2733.3                                           |                                                 |                                                         |                                                      |                                                      |                                                      |                                                     | 19.9                                                    | 11.6                                                 | 25.4                                                 |                                                      | 14.6                                                |
| 20 | 2113.3                                                 | 333.3                                            |                                                 | 147.0                                                   | 39.5                                                 | 125.0                                                | 10.2                                                 | 163.0                                               | 34.7                                                    | 9.5                                                  | 19.0                                                 |                                                      | 20.1                                                |
| 21 | 4466.7                                                 | 2533.3                                           |                                                 | 33.0                                                    | 4.7                                                  | 10.0                                                 | 1.1                                                  | 21.4                                                | 26.0                                                    | 7.3                                                  | 10.9                                                 | 1.2                                                  | 26.7                                                |
| 22 | 1980.0                                                 | 613.3                                            |                                                 | 14.1                                                    | 5.4                                                  | 1.5                                                  |                                                      | 1.9                                                 | 566.0                                                   | 216.0                                                | 159.2                                                | 90.0                                                 | 238.0                                               |
| 23 | 6800.0                                                 | 546.7                                            |                                                 | 122.0                                                   | 25.1                                                 | 56.0                                                 | 8.6                                                  | 115.0                                               | 11.3                                                    | 3.5                                                  | 2.5                                                  | 0.6                                                  | 17.1                                                |
| 24 | 34000.0                                                | 15066.7                                          |                                                 | 15.0                                                    | 7.0                                                  | 3.4                                                  |                                                      | 8.2                                                 | 15.0                                                    | 9.0                                                  | 4.3                                                  |                                                      | 7.7                                                 |
| 25 | 10666.7                                                | 3333.3                                           |                                                 | 31.1                                                    | 22.6                                                 | 9.1                                                  | 4.2                                                  | 16.7                                                | 76.0                                                    | 54.9                                                 | 20.7                                                 | 2.9                                                  | 58.1                                                |
| 26 | 16200.0                                                | 7466.7                                           |                                                 | 35.7                                                    | 12.7                                                 | 8.5                                                  |                                                      | 9.6                                                 | 233.3                                                   | 96.0                                                 | 156.5                                                | 23.0                                                 | 255.4                                               |
| 27 | 2133.3                                                 | 810.0                                            |                                                 | 148.5                                                   | 54.1                                                 | 60.3                                                 | 7.3                                                  | 82.0                                                | 267.8                                                   | 89.3                                                 | 110.0                                                | 30.4                                                 | 130.7                                               |
| 28 | 1960.0                                                 | 600.0                                            |                                                 | 34.0                                                    | 32.0                                                 | 3.8                                                  |                                                      |                                                     | 15.9                                                    | 9.8                                                  |                                                      |                                                      |                                                     |
| 29 | 12533.3                                                | 5866.7                                           |                                                 | 46.7                                                    | 44.0                                                 |                                                      |                                                      | 30.0                                                | 80.7                                                    | 36.7                                                 |                                                      |                                                      | 60.0                                                |
| 30 | 39600.0                                                | 13333.3                                          |                                                 | 198.0                                                   | 137.0                                                | 178.0                                                |                                                      | 159.0                                               | 265.0                                                   | 172.0                                                | 285.0                                                |                                                      | 229.0                                               |
| 31 | 260000.0                                               | 30666.7                                          |                                                 | 739.2                                                   | 177.8                                                | 257.0                                                | 39.6                                                 | 369.6                                               | 766.7                                                   | 142.0                                                | 360.0                                                | 65.3                                                 | 440.0                                               |
| 32 | 2573.9                                                 |                                                  |                                                 | 39.1                                                    | 17.2                                                 | 12.9                                                 | 3.8                                                  | 20.4                                                | 12.9                                                    | 7.4                                                  | 2.9                                                  |                                                      | 3.2                                                 |
| 33 | 8800.0                                                 | 3800.0                                           | 540.0                                           | 111.2                                                   | 50.0                                                 | 12.2                                                 | 5.1                                                  | 20.5                                                | 413.3                                                   | 122.0                                                | 82.0                                                 | 16.0                                                 | 174.7                                               |
| 34 | 15466.7                                                | 1566.7                                           |                                                 | 37.9                                                    | 27.1                                                 | 5.6                                                  |                                                      | 9.3                                                 | 84.3                                                    | 49.5                                                 | 16.0                                                 |                                                      | 21.7                                                |

**Supplementary Table S3. Size of particles for 1 mL of plasma/BALF in scatter, membrane, and tetraspanin labeling**

| Pt. | Plasma EVs      |              |             | cBALF EVs       |              |              |              |             | oBALF EVs       |              |              |              |             |
|-----|-----------------|--------------|-------------|-----------------|--------------|--------------|--------------|-------------|-----------------|--------------|--------------|--------------|-------------|
|     | Scatter<br>[nm] | CMDR<br>[nm] | CD9<br>[nm] | Scatter<br>[nm] | CMDR<br>[nm] | CD63<br>[nm] | CD81<br>[nm] | CD9<br>[nm] | Scatter<br>[nm] | CMDR<br>[nm] | CD63<br>[nm] | CD81<br>[nm] | CD9<br>[nm] |
| 1   | 94.6            | 105.9        | 88.6        | 195.8           | 193.9        | 80.9         | 79.6         | 93.2        | 197.3           | 201.2        | 78.9         | 84.5         | 89.7        |
| 2   | 102.7           | 113.2        |             | 167.0           | 181.1        | 83.5         |              | 105.1       | 153.7           | 171.0        | 95.7         |              | 95.7        |
| 3   | 99.6            | 98.4         |             | 217.9           | 243.0        | 274.2        | 227.5        | 185.6       | 151.4           | 177.5        | 78.0         | 84.8         | 81.5        |
| 4   | 109.2           | 154.5        |             | 147.4           | 154.0        | 105.2        |              | 125.5       | 161.4           | 170.4        | 85.5         | 176.0        | 97.1        |
| 5   | 83.4            | 102.0        |             | 140.0           | 128.2        | 84.3         |              | 102.1       | 167.7           | 178.9        | 107.6        | 160.0        | 125.3       |
| 6   | 98.9            | 123.8        |             | 159.6           | 161.6        | 104.4        | 79.2         | 103.0       | 151.1           | 152.1        | 88.8         | 78.4         | 92.9        |
| 7   | 104.4           | 117.5        |             | 179.0           | 162.8        | 161.5        |              | 138.0       | 179.5           | 206.6        | 97.7         |              | 108.3       |
| 8   | 91.4            | 117.3        |             | 152.7           | 164.8        | 92.9         | 96.0         | 100.6       | 150.4           | 160.2        | 87.0         |              | 84.0        |
| 9   | 112.4           | 129.0        |             | 196.3           | 192.0        | 103.0        |              | 100.1       | 158.8           | 165.4        | 94.1         |              | 113.3       |
| 10  | 102.9           | 106.0        | 77.8        | 196.3           | 192.0        | 103.0        |              | 100.1       | 170.5           | 164.2        | 78.6         |              | 85.4        |
| 11  | 98.4            | 108.0        |             | 154.1           | 161.3        | 79.0         | 89.4         | 90.6        | 161.0           | 164.7        | 83.2         | 176.2        | 86.9        |
| 12  | 89.5            | 128.5        |             | 166.2           | 175.3        | 81.9         |              | 96.8        | 164.3           | 169.8        | 92.9         |              | 111.8       |
| 13  | 95.3            | 114.4        |             |                 |              |              |              |             | 173.6           | 169.7        | 131.2        |              | 120.0       |
| 14  | 119.1           | 132.1        |             | 191.6           | 208.4        | 80.2         | 196.1        | 84.0        | 189.0           | 195.1        | 85.5         | 79.0         | 91.5        |
| 15  | 104.3           | 110.6        |             | 158.3           | 169.8        | 102.6        | 109.4        | 90.2        | 166.2           | 175.6        | 112.0        | 92.7         | 98.3        |
| 16  | 109.2           | 131.3        |             | 163.6           | 174.9        | 80.0         | 92.3         | 81.5        | 156.7           | 162.4        | 76.1         |              | 85.8        |
| 17  | 107.5           | 118.9        |             | 185.1           | 188.0        | 86.7         |              | 102.1       | 173.4           | 172.1        | 80.7         |              | 92.7        |
| 18  | 106.1           | 126.5        |             | 211.2           | 256.5        | 84.3         |              | 88.1        | 189.0           | 182.6        | 86.6         |              | 106.2       |
| 19  | 112.8           | 154.8        |             |                 |              |              |              |             | 169.3           | 179.9        | 76.3         |              | 82.0        |
| 20  | 95.0            | 122.1        |             | 169.0           | 209.1        | 79.3         | 87.8         | 87.4        | 161.8           | 198.7        | 78.6         |              | 82.0        |
| 21  | 83.7            | 88.9         |             | 177.2           | 214.7        | 84.9         | 117.8        | 89.0        | 171.8           | 192.9        | 93.6         | 152.4        | 90.6        |
| 22  | 93.9            | 110.7        |             | 163.5           | 188.8        | 97.1         |              | 140.9       | 160.1           | 159.9        | 89.4         | 157.2        | 98.3        |
| 23  | 102.2           | 140.6        |             | 150.2           | 218.9        | 78.4         | 93.7         | 81.5        | 179.4           | 217.6        | 83.7         | 91.3         | 88.4        |
| 24  | 89.4            | 98.1         |             | 185.9           | 218.9        | 121.5        |              | 109.5       | 173.4           | 196.0        | 97.1         |              | 92.1        |
| 25  | 84.3            | 95.6         |             | 153.6           | 156.6        | 82.7         | 159.1        | 97.9        | 150.8           | 157.7        | 80.8         | 205.9        | 80.6        |
| 26  | 83.8            | 88.9         |             | 157.5           | 169.7        | 87.0         |              | 109.3       | 147.3           | 155.8        | 78.8         | 222.9        | 87.0        |
| 27  | 89.6            | 101.8        |             | 159.3           | 167.9        | 82.6         | 83.7         | 97.3        | 162.5           | 178.4        | 89.5         | 170.6        | 91.3        |
| 28  | 95.5            | 119.1        |             | 235.1           | 242.8        | 166.5        |              |             | 186.3           | 184.9        |              |              |             |
| 29  | 107.3           | 117.0        |             | 129.8           | 97.8         |              |              | 82.4        | 181.7           | 173.4        |              |              | 79.4        |
| 30  | 107.6           | 128.3        |             | 189.2           | 184.8        | 91.2         |              | 122.0       | 184.2           | 191.5        | 90.0         |              | 103.3       |
| 31  | 113.7           | 158.5        |             | 168.0           | 170.8        | 84.2         |              | 98.8        | 148.1           | 149.0        | 89.8         | 93.4         | 89.4        |
| 32  | 84.5            |              |             | 139.1           | 151.6        | 78.0         | 79.8         | 80.9        | 144.3           | 147.9        | 82.7         |              | 107.8       |
| 33  | 85.4            | 93.9         | 103.5       | 172.4           | 181.3        | 105.8        | 145.8        | 126.5       | 153.4           | 166.2        | 94.7         | 107.6        | 102.2       |
| 34  | 89.1            | 115.3        |             | 170.6           | 182.0        | 96.9         |              | 120.6       | 174.9           | 187.8        | 103.7        |              | 127.9       |

**Supplementary Table S4. The concentration of particles – the fraction of all particles [%] in six size fractions (< 50nm, 50–100 nm, 100–150 nm, 150–200 nm, 200–250 nm, >250 nm) for plasma, BALF, and cell line EVs**

|         | plasma EVs |       |       | oBALF EVs |       |       |       |       | NSCLC Cell line EVs |       |       |       |       |
|---------|------------|-------|-------|-----------|-------|-------|-------|-------|---------------------|-------|-------|-------|-------|
|         | Scatter    | CD9   | CMDR  | Scatter   | CD63  | CD9   | CD81  | CMDR  | Scatter             | CD63  | CD9   | CD81  | CMDR  |
| [nm]    | [%]        | [%]   | [%]   | [%]       | [%]   | [%]   | [%]   | [%]   | [%]                 | [%]   | [%]   | [%]   | [%]   |
| < 50    | 1.44       | 19.59 | 2.52  | 0.42      | 8.42  | 7.67  | 13.96 | 0.56  | 0.62                | 12.88 | 16.69 | 9.75  | 1.09  |
| 50–100  | 42.54      | 52.17 | 37.18 | 7.11      | 43.28 | 37.21 | 39.52 | 5.83  | 15.18               | 44.02 | 46.96 | 39.90 | 19.77 |
| 100–150 | 38.44      | 26.00 | 39.74 | 24.04     | 24.94 | 27.18 | 23.26 | 20.84 | 39.07               | 20.55 | 23.75 | 30.25 | 36.18 |
| 150–200 | 11.97      | 1.12  | 13.10 | 25.37     | 12.21 | 15.12 | 9.30  | 24.40 | 25.80               | 11.73 | 7.70  | 12.04 | 23.14 |
| 200–250 | 3.47       | 0.00  | 4.42  | 18.54     | 5.78  | 6.48  | 4.65  | 18.35 | 11.04               | 6.95  | 3.00  | 3.62  | 10.76 |
| > 250   | 2.14       | 1.12  | 3.03  | 24.53     | 5.37  | 6.34  | 9.30  | 30.02 | 8.28                | 3.85  | 1.90  | 4.43  | 9.06  |

---

**Supplementary Table S5. Concentration of protein for 1 mL of plasma/BALF**

| Patient no. | The concentration of<br>protein in plasma EVs<br>[ug/mL of plasma] | The concentration of<br>protein in cBALF EVs<br>[ug/mL of BALF] | The concentration of<br>protein in oBALF EVs<br>[ug/mL of BALF] |
|-------------|--------------------------------------------------------------------|-----------------------------------------------------------------|-----------------------------------------------------------------|
| 1           | 31.99                                                              | 1.47                                                            | 2.21                                                            |
| 2           | 121.86                                                             | 0.42                                                            | 0.08                                                            |
| 3           | 149.72                                                             | 0.16                                                            | 1.03                                                            |
| 4           | 16.71                                                              | 0.04                                                            | 1.37                                                            |
| 5           | 248.20                                                             | 1.03                                                            | 0.52                                                            |
| 6           | 130.64                                                             | 0.44                                                            | 0.23                                                            |
| 7           | 306.93                                                             | 0.14                                                            | 0.42                                                            |
| 8           | 116.34                                                             | 0.23                                                            | 0.34                                                            |
| 9           | 51.35                                                              | 0.96                                                            | 0.08                                                            |
| 10          | 109.58                                                             | 2.77                                                            | 4.01                                                            |
| 11          | 236.44                                                             | 0.95                                                            | 1.82                                                            |
| 12          | 172.83                                                             | 1.41                                                            | 0.21                                                            |
| 13          | 177.31                                                             |                                                                 |                                                                 |
| 14          | 211.36                                                             | 0.13                                                            | 0.23                                                            |
| 15          | 67.22                                                              | 0.07                                                            | 0.50                                                            |
| 16          | 112.19                                                             | 1.79                                                            |                                                                 |
| 17          | 146.98                                                             | 0.42                                                            | 0.45                                                            |
| 18          | 8.56                                                               | 0.63                                                            | 0.42                                                            |
| 19          | 193.37                                                             | 0.33                                                            | 0.33                                                            |
| 20          | 80.91                                                              | 3.08                                                            | 0.72                                                            |
| 21          | 185.18                                                             | 0.53                                                            | 0.27                                                            |
| 22          | 74.51                                                              | 0.10                                                            | 2.32                                                            |
| 23          | 20.41                                                              | 3.05                                                            | 0.22                                                            |
| 24          | 70.36                                                              | 0.12                                                            | 0.16                                                            |
| 25          | 85.66                                                              | 0.14                                                            | 0.35                                                            |
| 26          | 155.36                                                             | 0.21                                                            | 2.26                                                            |
| 27          | 101.06                                                             | 0.93                                                            | 1.67                                                            |
| 28          | 70.73                                                              |                                                                 |                                                                 |
| 29          | 84.90                                                              | 0.84                                                            | 2.41                                                            |
| 30          | 139.12                                                             |                                                                 |                                                                 |
| 31          | 545.66                                                             | 5.46                                                            | 3.24                                                            |
| 32          | 248.62                                                             | 0.20                                                            | 0.00                                                            |
| 33          | 250.16                                                             | 0.24                                                            | 1.58                                                            |
| 34          | 292.43                                                             | 0.05                                                            | 0.11                                                            |

### Supplementary figure S1. EVs isolation from plasma - particle/protein ratio

Isolation of EVs from plasma was performed as described in Materials & Methods using 3 homemade columns (prepared 1 day before) and one new commercial Izon qEV/70 nm column. Fractions 1–8 (1 mL each) from the SEC columns were collected and measured for particle content by the NTA method and for protein content by the BCA method (Pierce). Most enriched in particles were fractions 4, 5 and 6 (mean concentration  $\pm$  SD was: F4:  $5.40 \times 10^{10} \pm 5.13 \times 10^9$ ; F5:  $1.70 \times 10^{11} \pm 6.17 \times 10^{10}$ ; F6:  $7.55 \times 10^{10} \pm 1.79 \times 10^{10}$  particles/mL) (**Fig. S 1a**). The protein concentration was below the detection limit of our BCA method in the first 4 fractions, was low in fractions 5-6, and increased rapidly in fractions 7-8 (**Fig. S 1b**). The particle/protein ratio was most beneficial (highest) in fractions 5 and 6 (ratio  $\pm$  SD was: F5:  $8.40 \times 10^9 \pm 1.53 \times 10^9$ ; F6:  $8.42 \times 10^8 \pm 1.01 \times 10^8$  particles/mL) (**Fig. S 1c**).

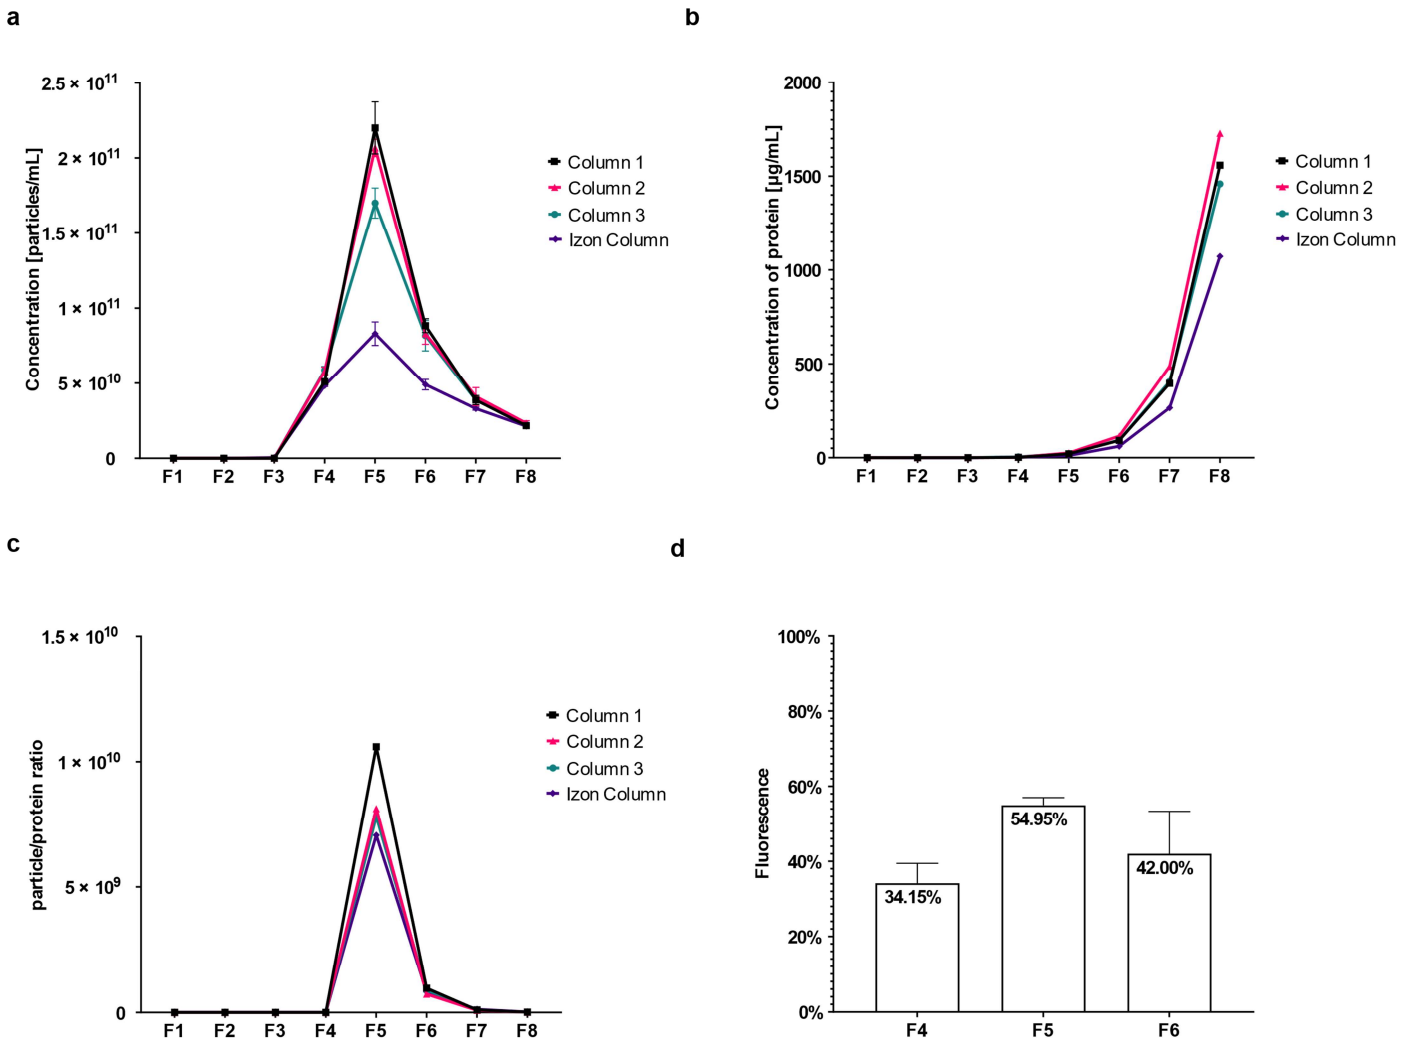

**Fig. S1. EVs separation from plasma on SEC - particle/protein ratio.** (a) The concentration of particles in fractions 1-8 from 3 home-made SEC columns and one commercial Izon column after separation of EVs from plasma. (b) The concentration of protein measured in 1-8 fraction for each column. (c) Particle/protein ratio in each fraction. (d) CMDR positive particles' fluorescence from all visible in the scatter of plasma EVs in fractions 4,5 and 6 from SEC. The experiment from figures (a-c) was conducted on two biological samples with three replicate measurements each. Graph d presents Mean and SD from two replicates. The experiment from graph (d) was created from measurements taken at Sensitivity 93.

Those results led us to further investigations on fractions 4, 5, and 6. We have performed membrane labeling of fractions 4, 5 and 6. The results showed that in F4 there was 34.15%, in F5 54.95%, and in F6 42.00% CMDR positive particles of all visible particles in scatter (**Fig. S1d**). All three fractions were enriched in EVs, but higher concentration of particles, the measurable concentration of protein, and higher percent of CMDR positive

particles led us to choose fractions 5 and 6, which we pulled for further analysis of the NSCLC patient's plasma-EV samples.

### Supplementary figure S2. Flow cytometry of BALF-EVs after coupling to CD63-, CD9- and CD81-specific magnetic beads

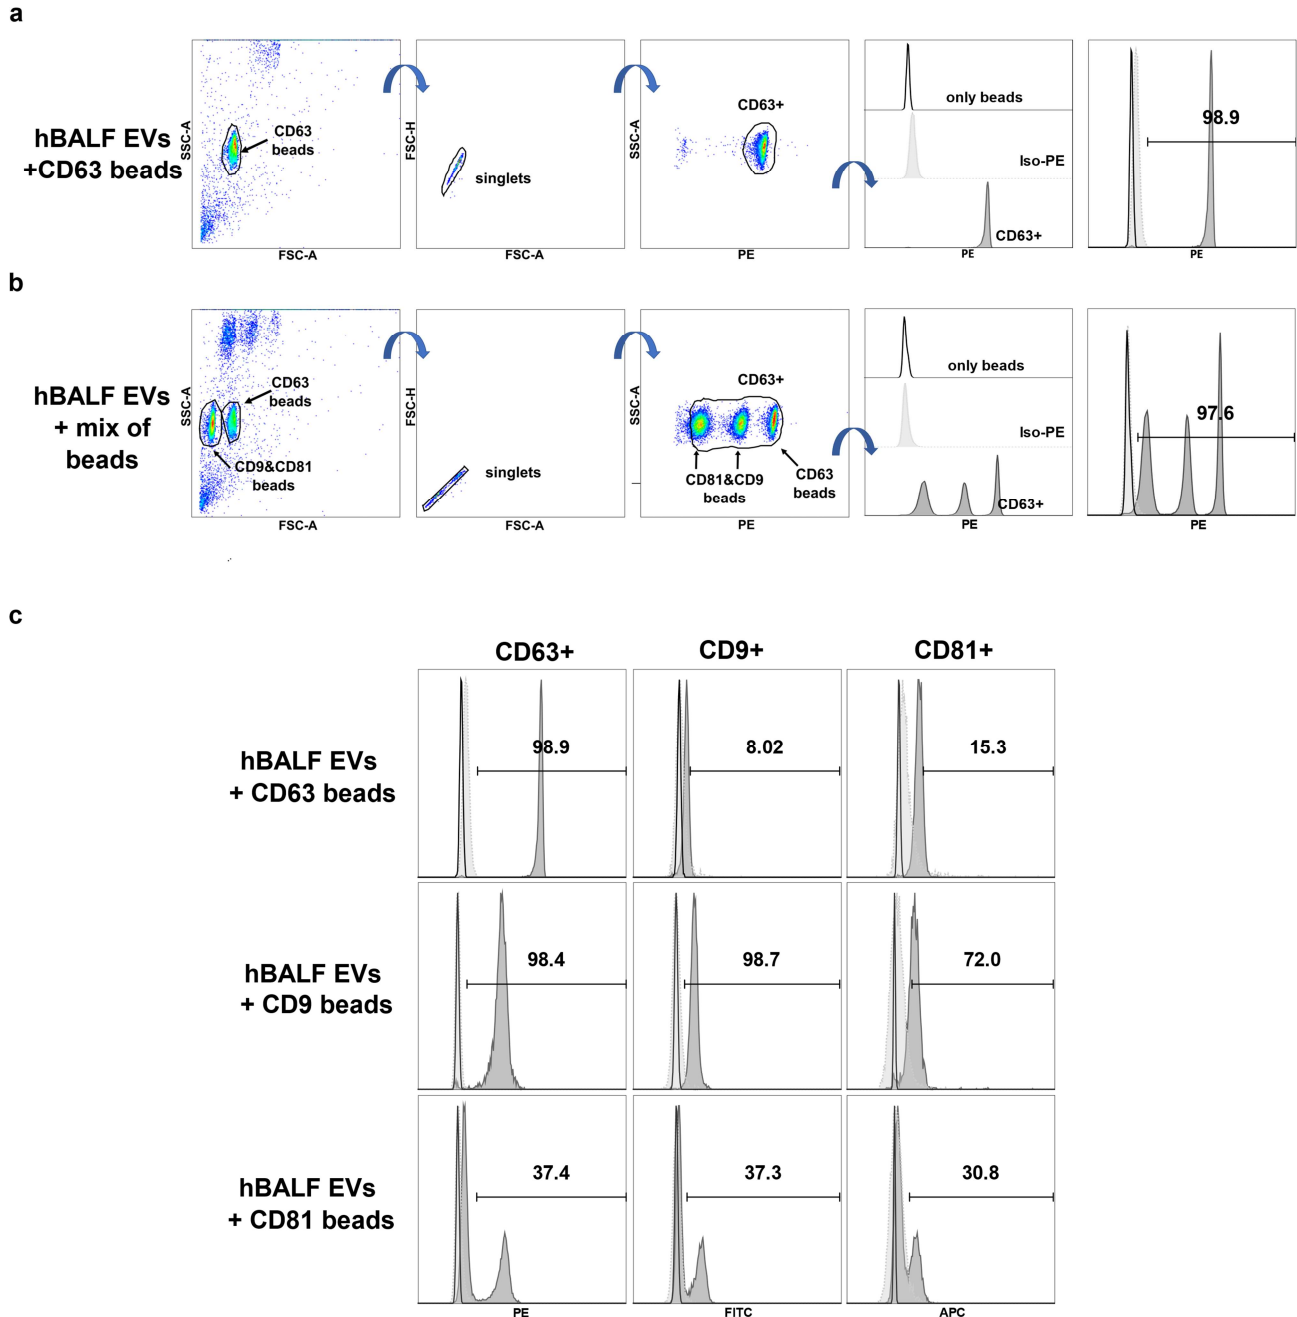

**Fig. S2. Flow cytometry analysis of oBALF-EVs bound to magnetic Dynabeads coated with antibodies against tetraspanins.** Figures (a & b) present examples of gating strategy and overlay creation. Gates were set first on single beads visible in the forward and side scatter, then on singlets. The gate for tetraspanin-positive events was set based on isotype control labeling so that a maximum of 5% of the isotype control was included in the gate. Samples with beads only, isotype labeled sample, and tetraspanin labeled sample were overlaid. (a) CD63 beads. (b) A mix of CD63, CD9, and CD81 beads. (c) One type of beads (CD63, CD9, or CD81) bound to oBALF-EVs and labeled with CD63-PE, CD9-FITC, and CD81-APC. The highest percentage and MFI for a given tetraspanin were usually achieved with beads specific for this given tetraspanin. An exemption were CD81-beads, where only up to 40% of beads captured any vesicles. EVs captured by CD9 beads showed the highest percent for all three markers (98.4% CD63, 98.7% CD9, and 72% CD81 positive particles). In the case of the CD63 beads, the highest percent had CD63 positive particles (98.9%), whereas there were only 8.02% CD9 and 15.3% CD81 positive particles. CD81 beads showed 37.4% of CD63, 37.3% CD9 and 30.8% CD81 positive particles.

### Supplementary figure S3. Analytical variability of the NTA measurements

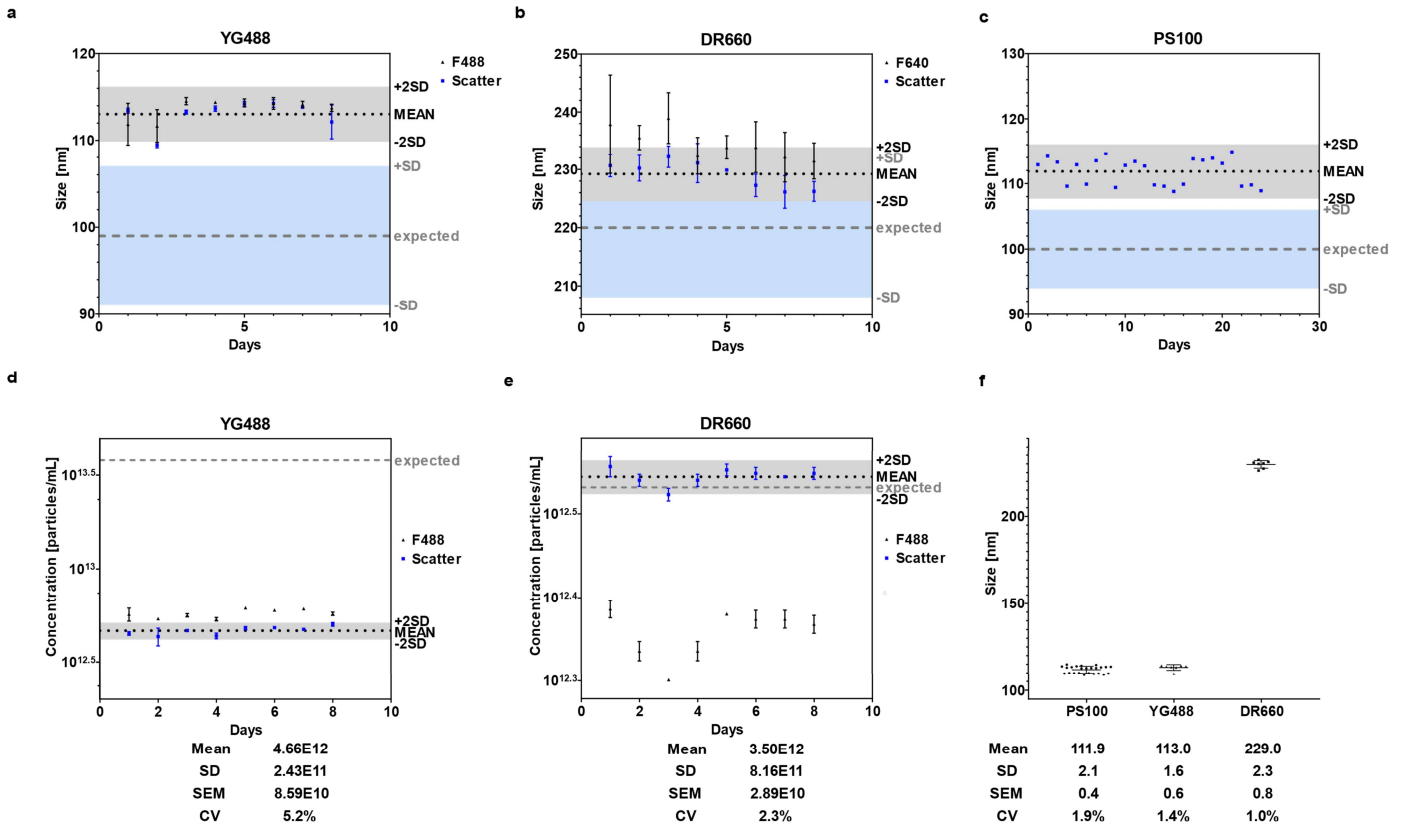

**Fig. S3. Variability of the measured size and concentration of standard beads on NTA.** (a) The size of YG488 particles in F488 (black) and scatter (blue) mode. (b) The size of DR660 particles in (black) and scatter (blue). (c) The size of PS100 particles in scatter mode - single data from calibration beads from 24 days. (d) The concentration of YG488 particles in (black) and scatter (blue). (e) The concentration of DR660 particles in F660 (black) and scatter (blue). (f) The mode size of PS100, YG488, and DR660 in the scatter mode with calculated Mean, SD, SEM, and CV. Graphs (a, b, d, e) were prepared from 3 replicate measurements performed for 8 days. Graphs (a, b, d, e) present the mean and SD of each replicate. MEAN  $\pm$  2 SD area is colored grey. MEAN value is marked with the black dotted line. The expected value from the beads certificate is marked with the grey dotted line (expected) with  $\pm$  SD area colored blue. All graphs were created from measurements in settings described in Materials & Methods dedicated to each type of beads.

### Supplementary figure S4. Optimization of dye concentration for measurements

Staining mixtures were prepared by adding different amounts of CMDR (final concentration for NTA measurement 0.5/1/2/4/6/8/10 [ng/mL]) to a constant appropriate amount of EVs sample (optimal for NTA measurement after final dilution). Mixtures were filled with PBS to a total volume of 10  $\mu$ L. Samples were incubated for 2 h at RT in the dark. Then, the samples were diluted in PBS and measured on NTA. The optimization experiment was conducted on nonconcentrated (pulled fraction 5 and 6) and concentrated plasma-EVs (pulled fraction 4-6) from Healthy Normal Control and on BALF-EVs from NSCLC patient (**Fig. S4**).

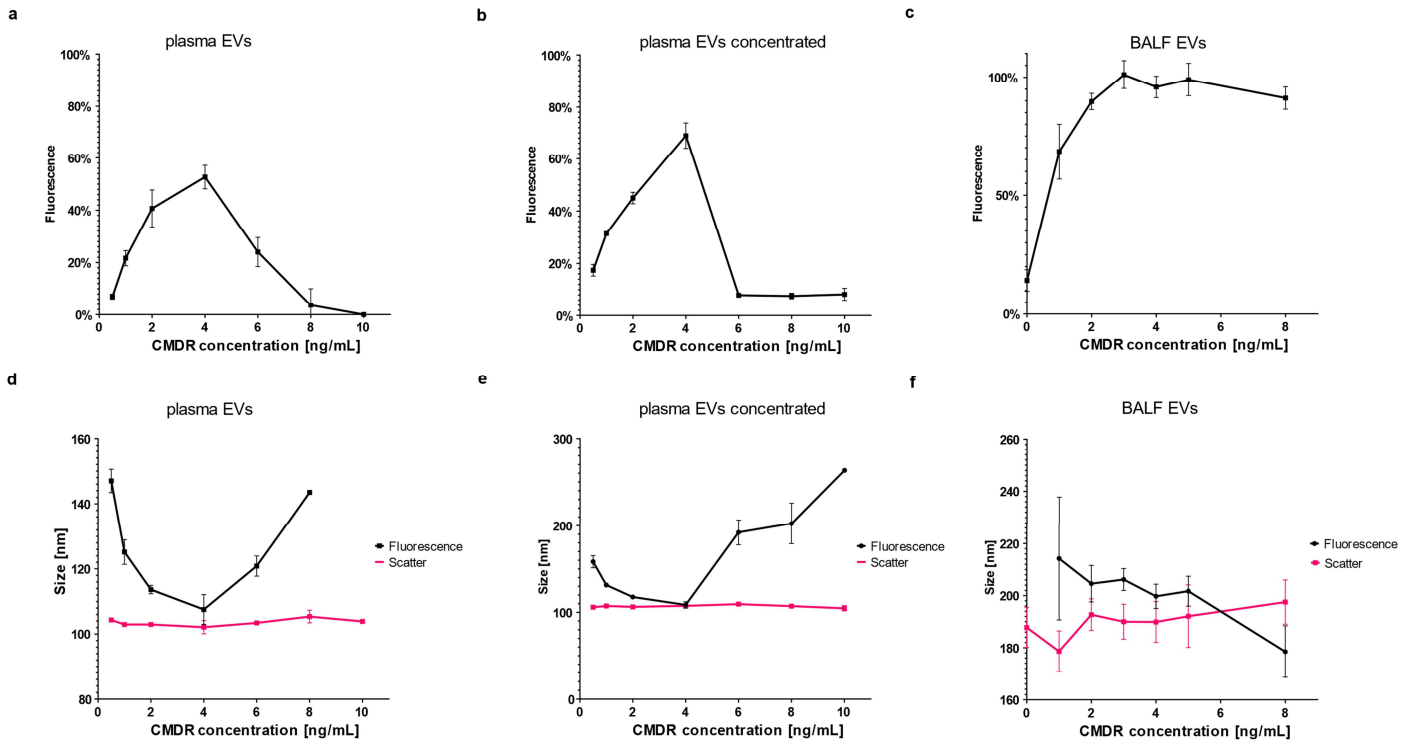

**Fig. S4. Optimization of CMDR concentration.** (a-c) CMDR positive particles' fluorescence from all visible in scatter for fresh, pulled fraction 5 and 6 of plasma EVs (a), concentrated, thawed, pulled fractions 4-6 of plasma EVs (b), and BALF EVs (c). (d-f) The mode size of particles in scatter and fluorescence for fresh, pulled fraction 5 and 6 of plasma EVs (d), concentrated, thawed, pulled fractions 4-6 of plasma EVs (e), and BALF EVs (f). Experiments were conducted on 3-6 replicate measurements. Graphs (a-f) present Mean and SD. Graphs (a) and (d) were created from measurements in settings described in Materials & Methods. Graphs (b, c, e, f) were created from measurements taken at Sensitivity 93.

The results showed that in plasma-EVs (both concentrated and nonconcentrated), the fluorescence reaches the highest percent for 4 ng/mL of final CMDR concentration on NTA (nonconcentrated:  $52.67 \pm 4.51\%$ , concentrated:  $68.9 \pm 4.90\%$ ), and then drops when more CMDR is present (**Fig. S4a, b**). For plasma-EVs the difference between particles' size in fluorescent and scatter mode was the smallest at 4 ng/mL CMDR ( $\Delta$  mean size: nonconcentrated: 5.42 nm, concentrated: 1.1 nm) (**Fig. S4d, e**). In the case of BALF-EVs, the concentration of particles in fluorescent mode reached a plateau at concentration 3 ng/mL CMDR (**Fig. S4c**). The difference between particles' size in fluorescent and scatter mode was the smallest at 2-5 ng/mL CMDR (**Fig. S4f**). The concentration 4 ng/mL CMDR was chosen as optimal for further staining experiments.

# Supplementary figure S5. Antibody labeling of cBALF and oBALF EVs

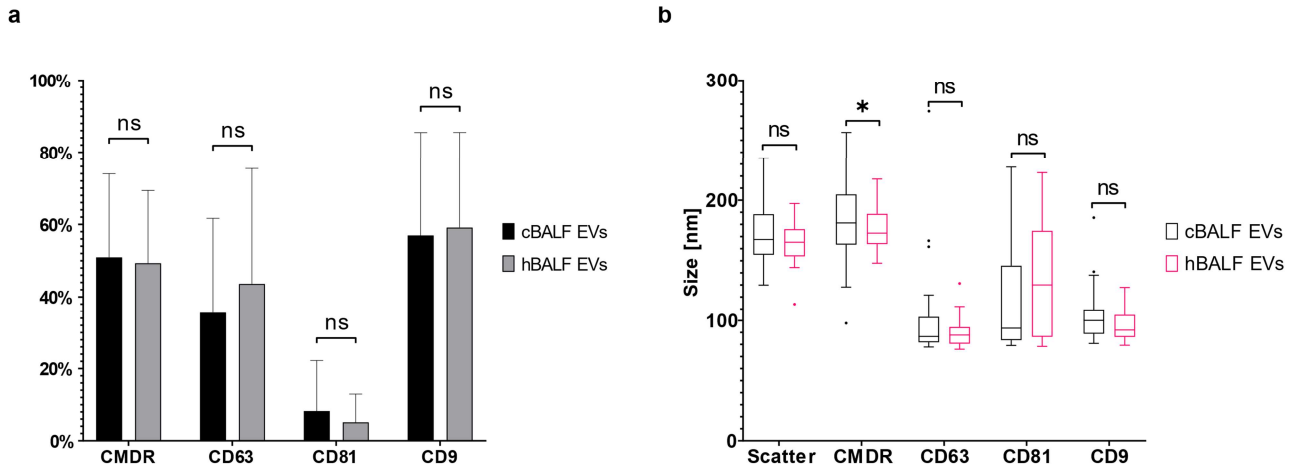

**Fig. S5. Antibody labeling of cBALF and oBALF EVs.** (a) The percent of fluorescent particles in comparison to all particles visible in scatter mode for cBALF and oBALF EVs for all patients. (b) Measured mode sizes of particles in scatter and in fluorescent mode (488, 640 nm) for cBALF and oBALF EVs for all patients. Graph (a) present Mean and SD for all patients. Graph (b) presents the Tukey plot for all patients. \* refers to p value  $\leq 0.05$ , ns refers to p value  $> 0.05$  from Wilcoxon test-paired comparison.

### Supplementary figure S6. RIPA lysis of NSCLC Cell line EVs - size

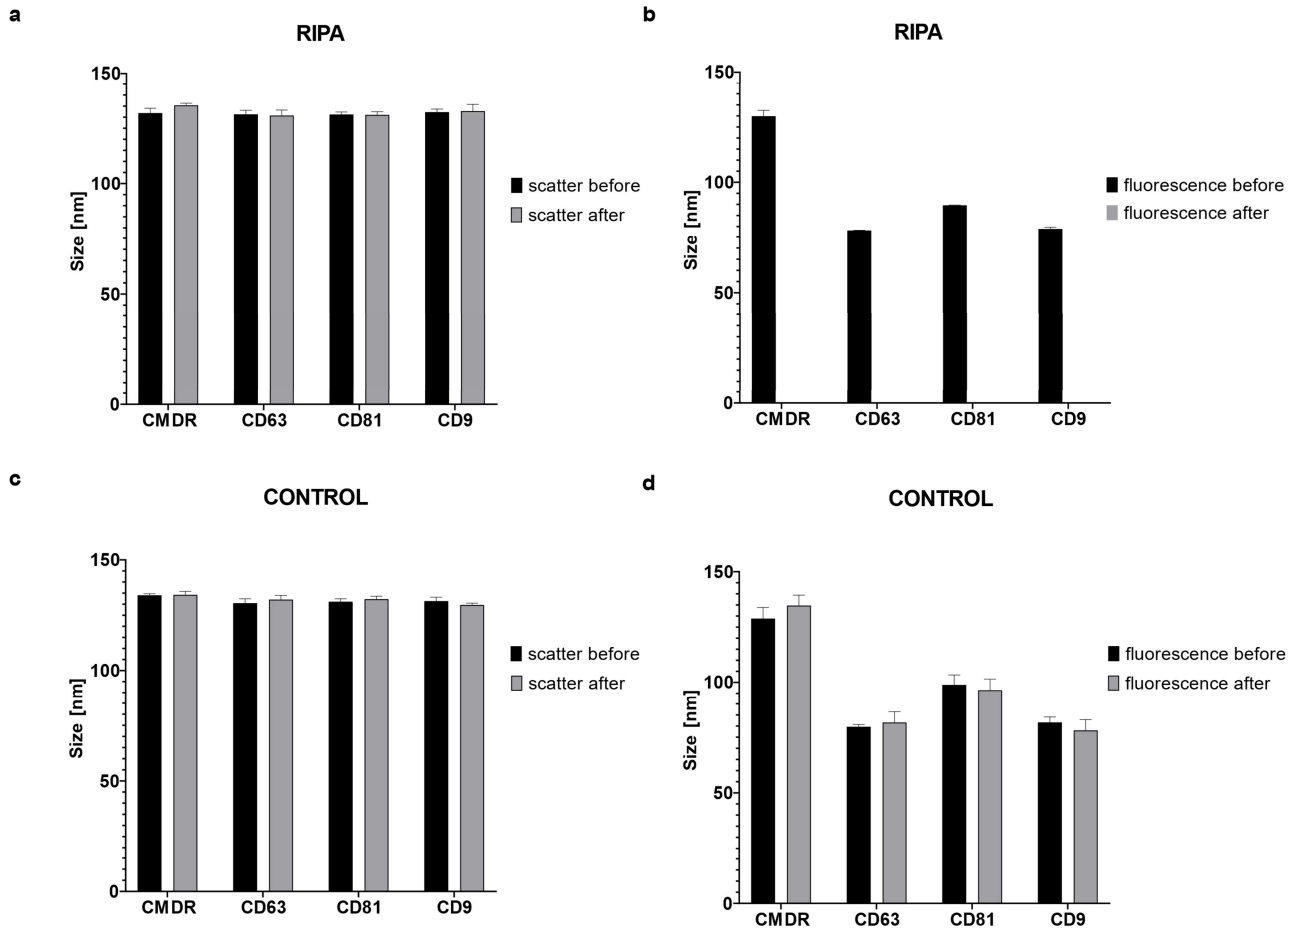

**Fig. S6. RIPA lysis of EVs.** (a-b) Particles' mode size after labeling with CMDR and tetraspanin markers of NSCLC Cell line EVs before and after incubation with RIPA lysis buffer measured in the scatter mode (a) and fluorescent mode (b). (c-d) Particles' mode size after labeling with CMDR and tetraspanin markers of NSCLC Cell line EVs before and after incubation with PBS (Control) measured in the scatter mode (c) and fluorescent mode (d). Graphs a-d present Mean and SD from three replicates.

### Supplementary figure S7. Cryo-TEM images of thawed cBALF EVs

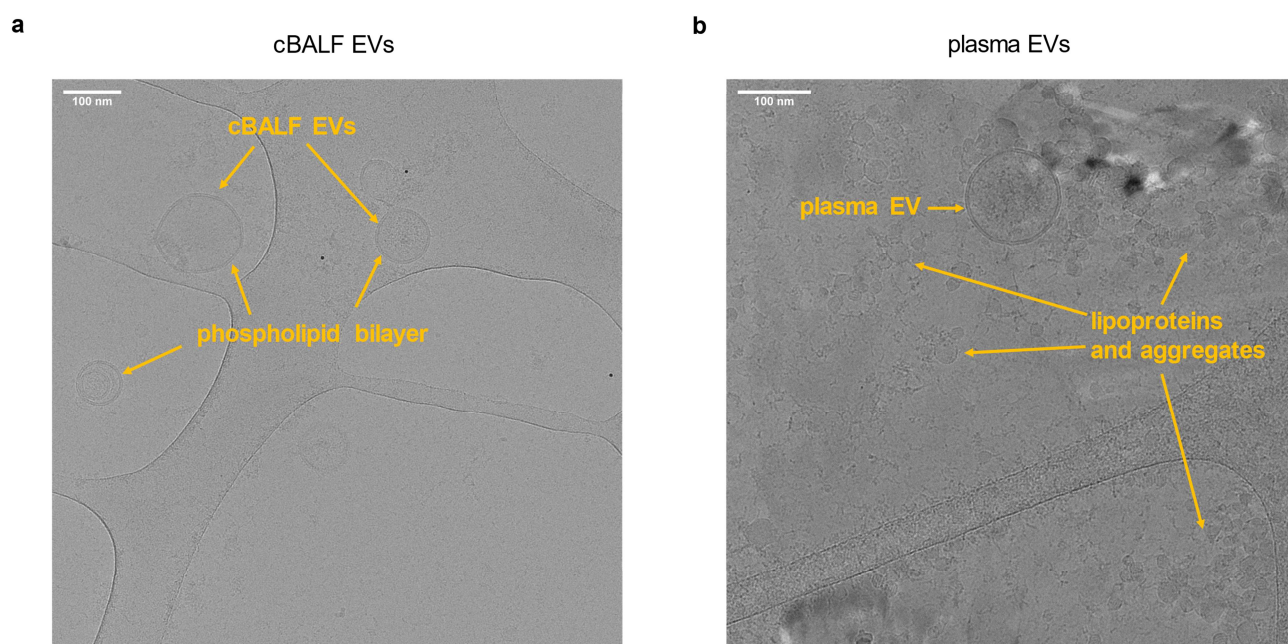

**Fig. S7. Cryo-TEM images of thawed cBALF EVs.** (a) Thawed cBALF EVs. There is a visible double phospholipid bilayer. (b) Plasma EVs. Besides EVs, particles with different morphology, like lipoproteins and aggregates, are visible.

### Full blots from Fig.2 (a)

Merged (chemiluminescence and colorimetric) blots with described protein ladder: Characterization of plasma/BAL EVs from NSCLC patients. Immunoblot analysis of EVs from Plasma and BALF of two NSCLC patients (Pt.3, Pt.4), a normal donor (NC) and a cell lysate (SEMK2). Each lane with plasma EVs represents the amount of protein present in 100  $\mu$ l of patients' plasma which was taken for the isolation. Each lane with BAL EVs represents the amount of protein present in 4 ml of Patients' BALF (from healthy or cancer lung) which was taken for the isolation. Cell lysate lane was loaded with 10  $\mu$ g of protein from cell lysate.

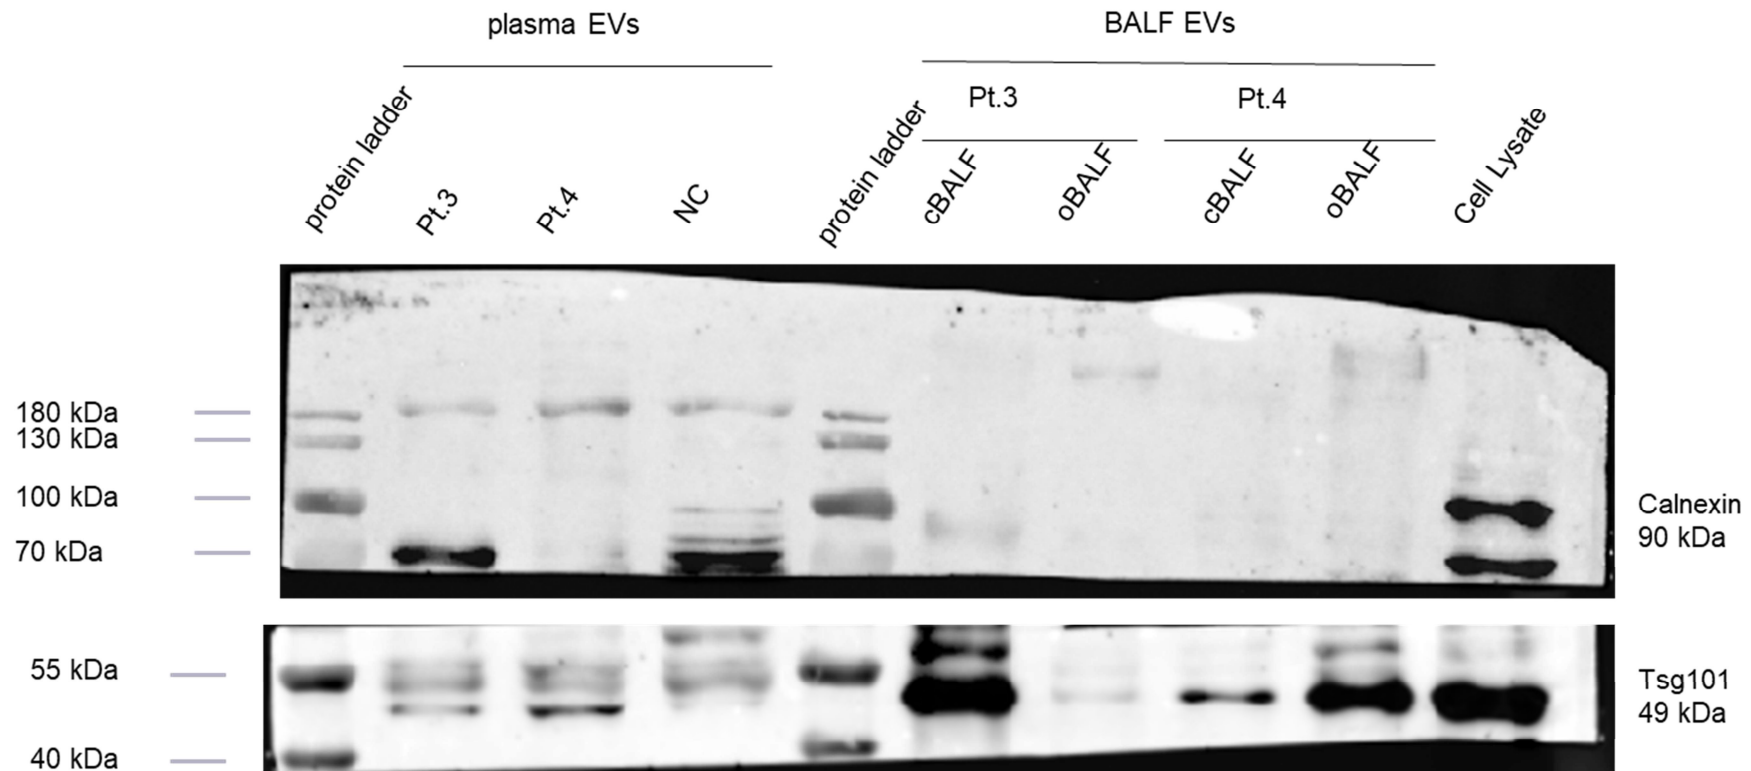

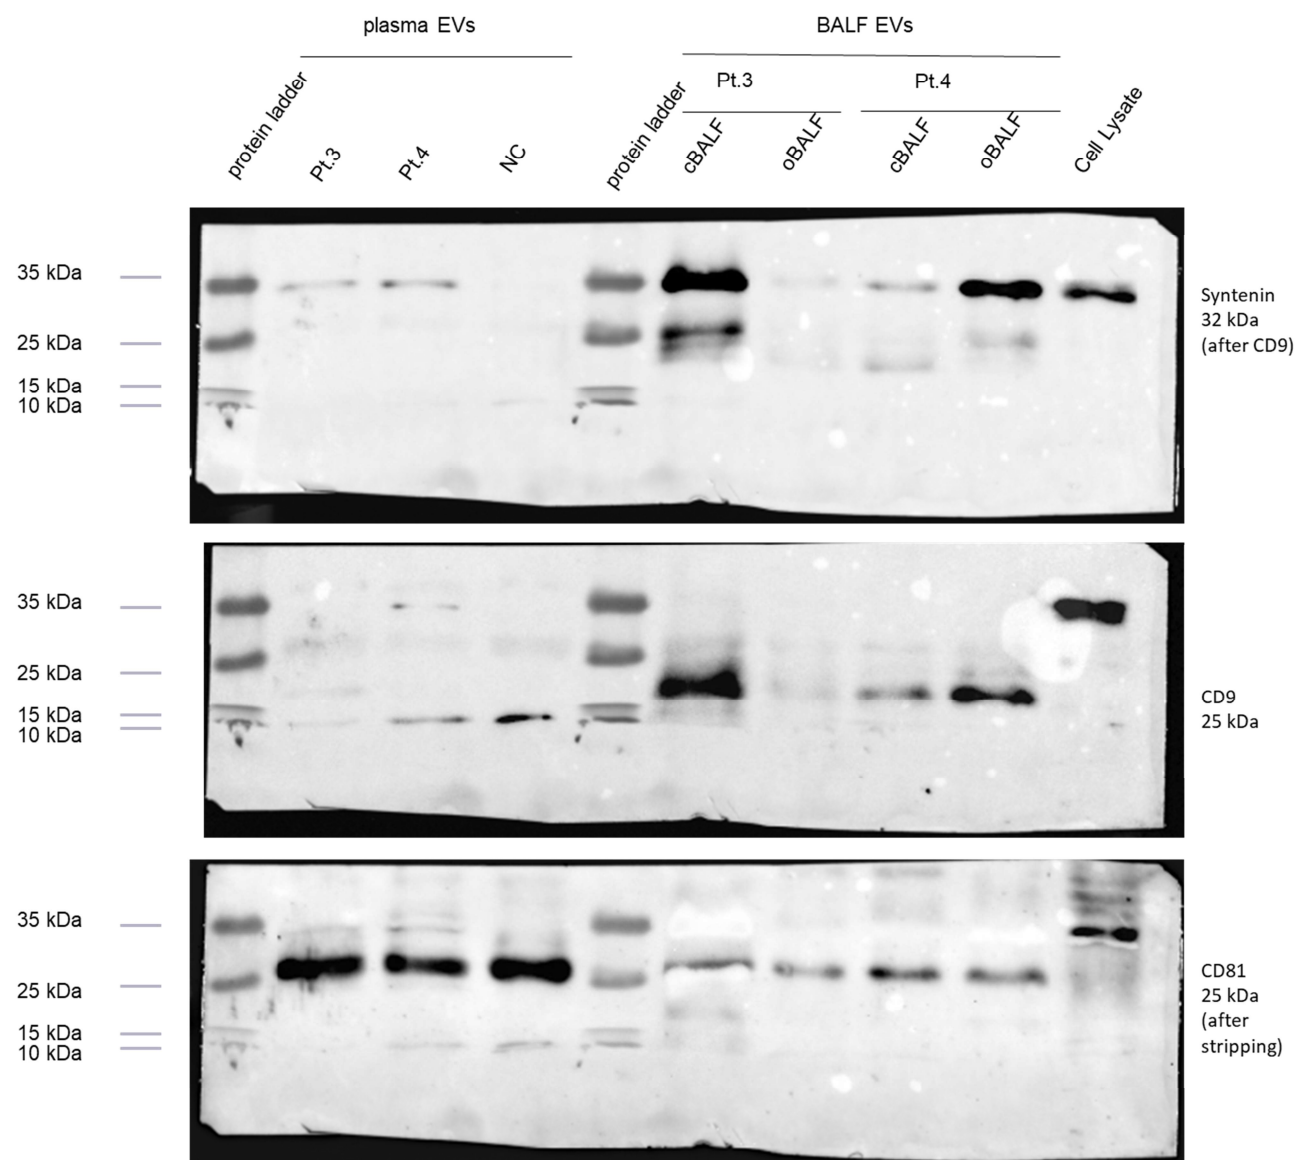

Supplementary figure S8. Lipoprotein marker Apo-B

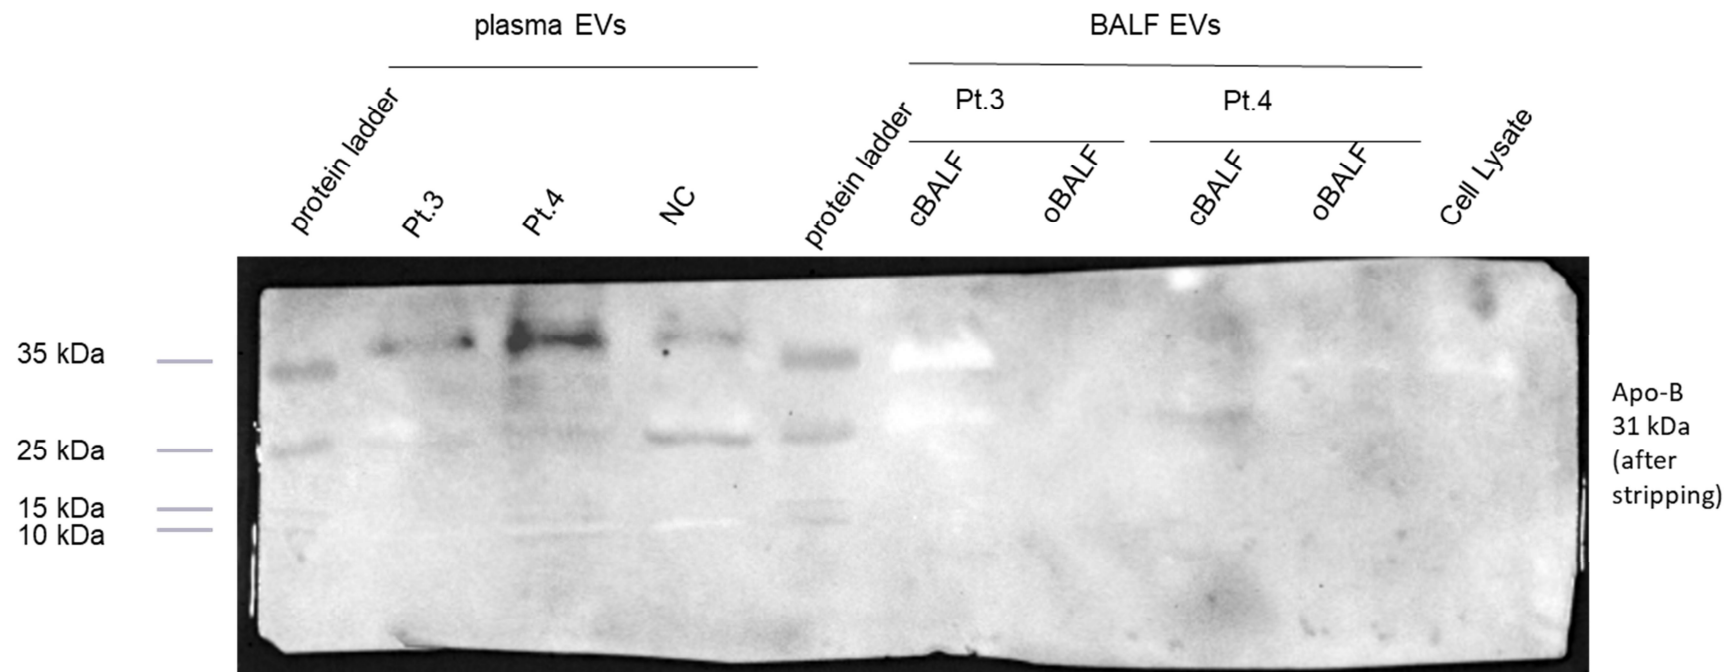

---

Raw pictures from Cryo-TEM from Fig. 2 (b)

cBALF  
EVs

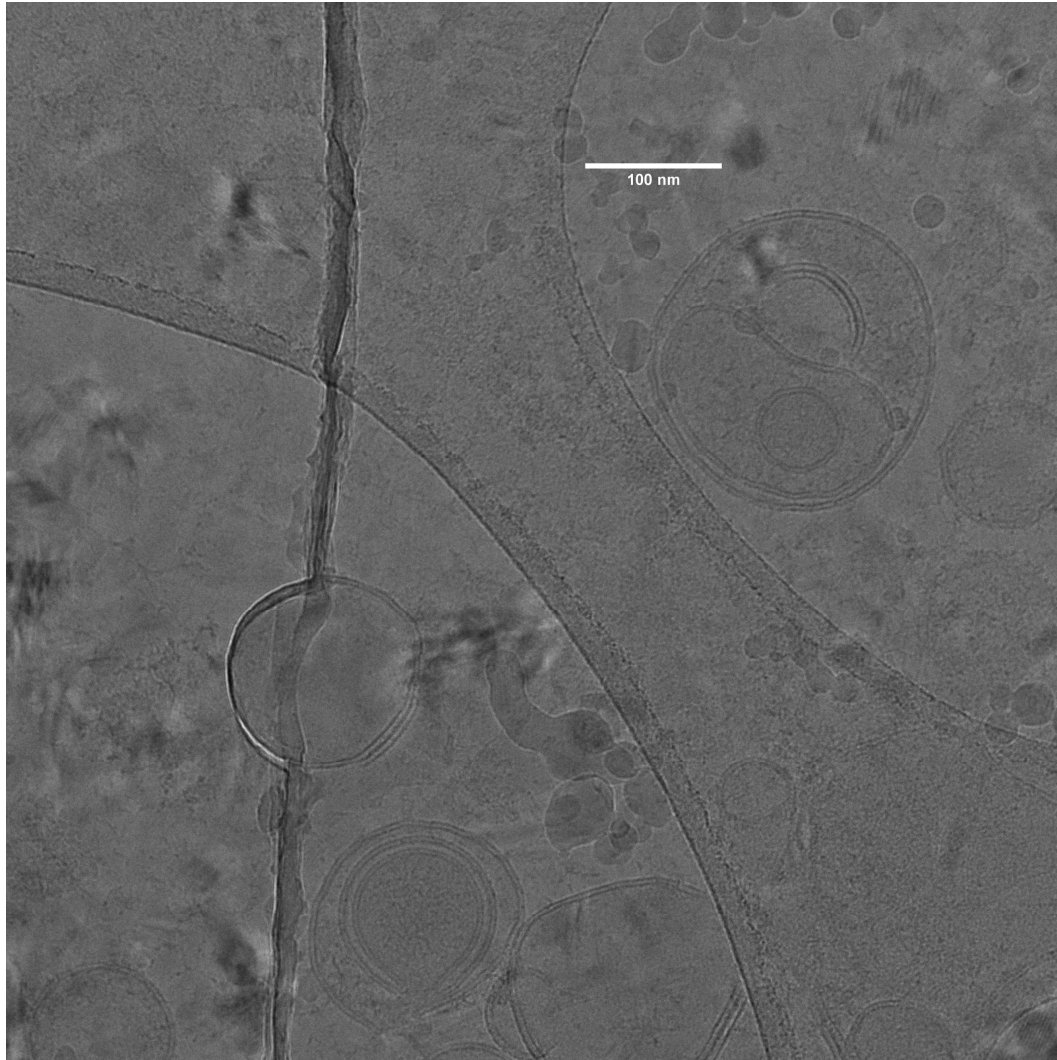

---

oBALF  
EVs

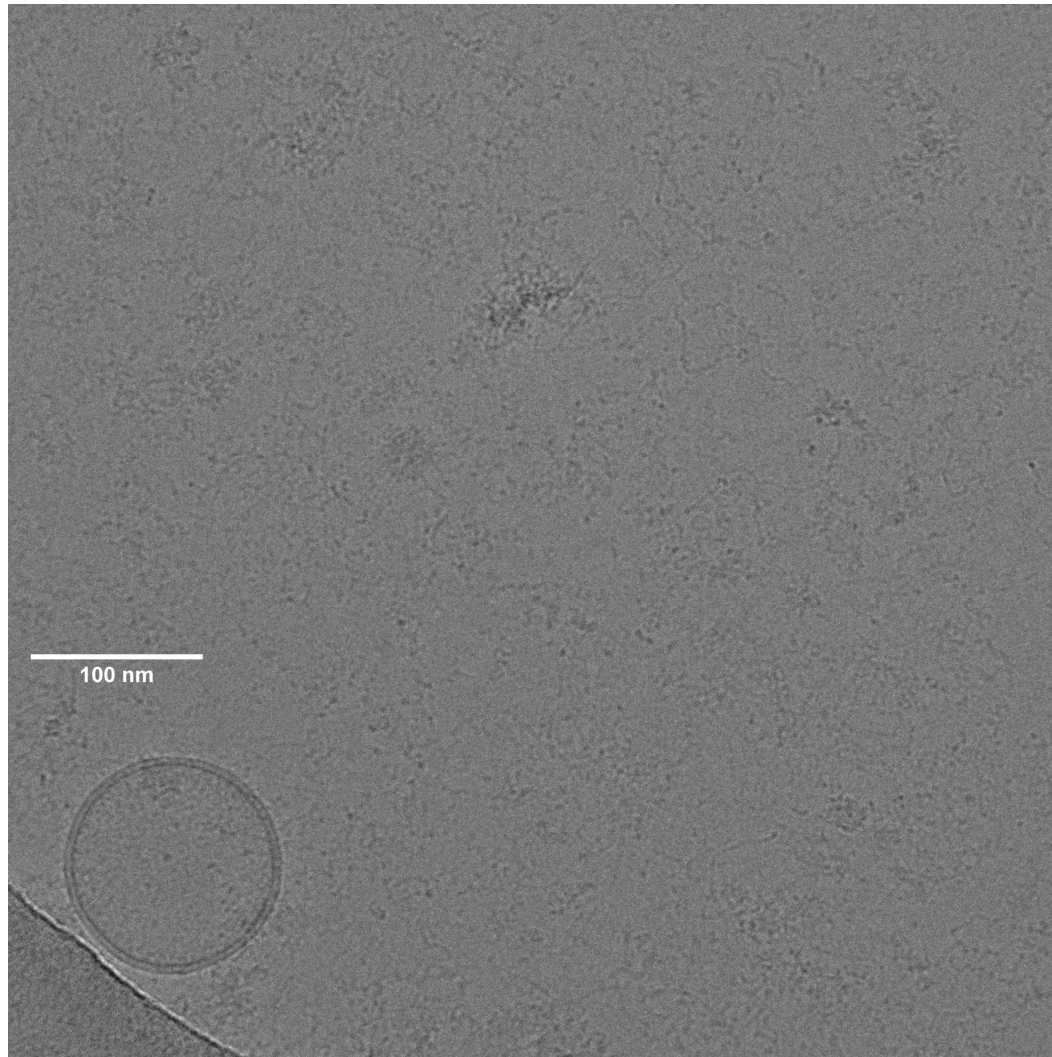

---

plasma  
EVs

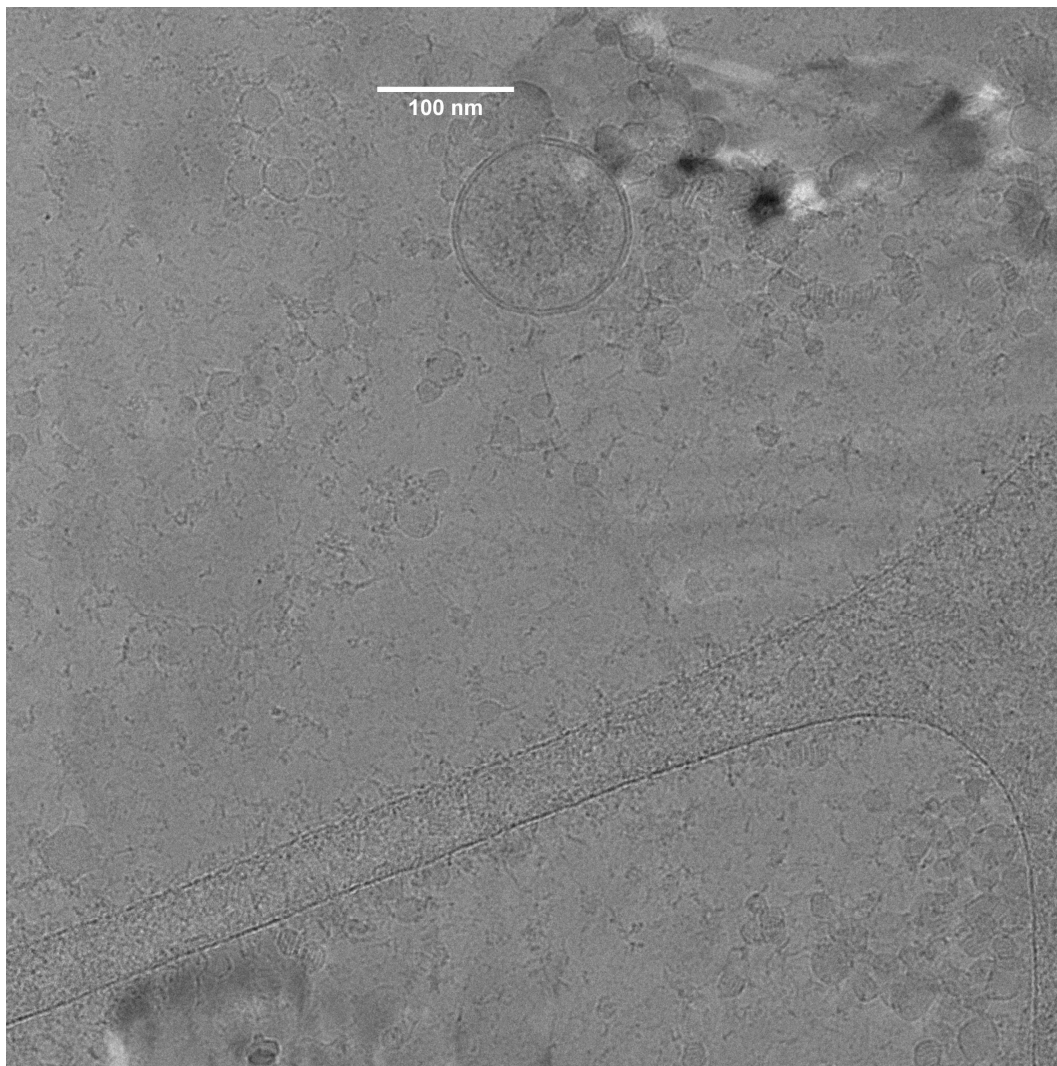

Supplement: s1 [file s1]
